# Supplementary material for: BMP2-loaded nanoporous silica nanoparticles promote osteogenic differentiation of human mesenchymal stem cells
Source: Royal Society of Chemistry journal article supplement (doi:10.1039/c3ra44734k), 2013-01-01
Supplement: c3ra44734k.pdf [file c3ra44734k.pdf]

# BMP2-loaded nanoporous silica nanoparticles promote osteogenic differentiation of human mesenchymal stem cells

Anne Neumann,<sup>#a</sup> Anne Christel,<sup>#b</sup> Cornelia Kasper,<sup>a,\*</sup> Peter Behrens<sup>b,\*</sup>

<sup>a</sup> Department of Biotechnology, University of Natural Resources and Life Sciences, Muthgasse 18, 1190 Vienna, Austria. Cornelia.Kasper@boku.ac.at

<sup>b</sup> Cluster of Excellence "Hearing4all", Institut für Anorganische Chemie, Leibniz Universität Hannover, Callinstraße 9, 30167 Hannover, Germany. Peter.Behrens@acb.uni-hannover.de

<sup>#</sup> Both authors contributed equally to this work

Electronic Supplementary Information (ESI)

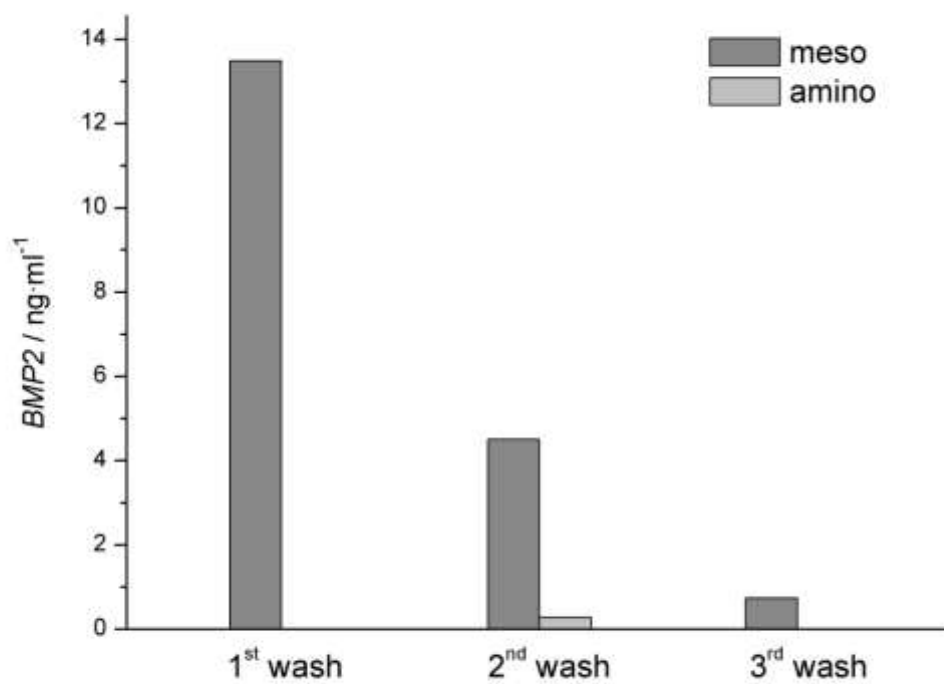

**Fig. S1.** Amount of BMP2 which could be washed off from unmodified and amino-modified nanoporous silica nanoparticles. The amount was determined with the ELISA.
